# Supplementary material for: Safflower CtFLS1-Induced Drought Tolerance by Stimulating the Accumulation of Flavonols and Anthocyanins in Arabidopsis thaliana
Source: MDPI journal article supplement (doi:10.3390/ijms25105546), 2024-05-19
Supplement: s1 [file s1]

**Table S1.** Primers used in qRT-PCR analysis in this study.

| Primer name             | Sequence (5'-3')        |
|-------------------------|-------------------------|
| qRT- <i>CtFLS1</i> -F   | TGAAACAAGTGGTCCACCCAC   |
| qRT- <i>CtFLS1</i> -R   | ACCATAGCCAAGCCTGCAAA    |
| qRT- <i>AtCHS</i> -F    | AGAAGTTCAAGCGCATGTGC    |
| qRT- <i>AtCHS</i> -R    | AGAGAAGGAGCCATGTAAGCAC  |
| qRT- <i>AtFLS1</i> -F   | TGCAGTGCATGTGAAGAAGC    |
| qRT- <i>AtFLS1</i> -R   | CGAGACCTTCTTTCAACGCATC  |
| qRT- <i>AtDFR</i> -F    | ATTTGCCAAACGCCAAGACG    |
| qRT- <i>AtDFR</i> -R    | TGTTGCCACGTGGAAAACAC    |
| qRT- <i>AtANS</i> -F    | TGCAAACGATCAAGCCACTG    |
| qRT- <i>AtANS</i> -R    | TTGTCCACTCGCGTTGTTAG    |
| qRT- <i>AtMYB11</i> -F  | TTGTTCGAGGCTGTTAGATGGAG |
| qRT- <i>AtMYB11</i> -R  | ACAAAAGCCAAGCAGCCATC    |
| qRT- <i>AtMYB12</i> -F  | ATGACGAACGCTTCTTCAGC    |
| qRT- <i>AtMYB12</i> -R  | TGGTGCAGACGTTTTCTTCG    |
| qRT- <i>AtMYB111</i> -F | GTCAAGTTGCATTCCCTTCTCG  |
| qRT- <i>AtMYB111</i> -R | TTTTGCGGCTGAGATGTGAG    |
| qRT- <i>AtMYB113</i> -F | TTGATCGCTGGTAGATTGCC    |
| qRT- <i>AtMYB113</i> -R | AGCATCGTTCATCGTGCTTC    |
| 18s <i>rRNA</i> -F      | GAGAAACGGCTACCACATCCAA  |
| 18s <i>rRNA</i> -R      | TCGTTTGAGCCCGGTATTGTTA  |

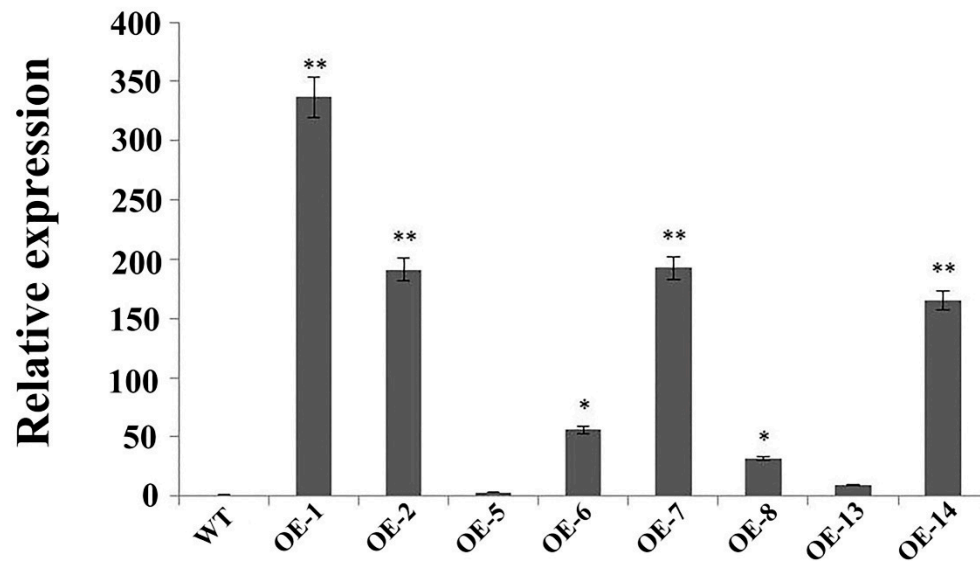

**Figure S1.** The relative expression of *CtFLS1* gene in different *CtFLS1* transgenic *Arabidopsis* lines. Significance analysis t test: \* $P < 0.05$ , \*\* $P < 0.01$ .
